# Supplementary material for: Anisotropic chemical strain in cubic ceria due to oxygen-vacancy-induced elastic dipoles
Source: Royal Society of Chemistry journal article supplement (doi:10.1039/c8cp01219a), 2018-01-01
Supplement: c8cp01219a1.pdf [file c8cp01219a1.pdf]

## Supporting Information for

### Anisotropic Chemical Strain in Cubic Ceria due to Oxygen-Vacancy-Induced Elastic Dipoles

Tridip Das<sup>1</sup>, Jason D. Nicholas<sup>1</sup>, Brian W. Sheldon<sup>2</sup>, and Yue Qi<sup>1,\*</sup>

<sup>1</sup>Chemical Engineering & Materials Science Department, Michigan State University, East  
Lansing, MI 48824, USA

<sup>2</sup>School of Engineering, Brown University, Providence, RI 02912, USA

#### Section S1. Derivation of Strain Tensor Using Elastic Dipole Tensor

The chemical strain tensor at a given dilute oxygen vacancy concentration can be calculated by minimizing the total energy,  $\Delta E_{total}$  with respect to the applied strain.  $\Delta E_{total}$  consists of the energy due to local lattice distortion caused by oxygen vacancy formation,  $\Delta E_{short}$  and the long-range elastic strain energy caused by oxygen vacancy formation,  $\Delta E_{long}$ , as:

$$\Delta E_{total} = \Delta E_{short} + \Delta E_{long} = \frac{\delta}{V_U} G : \varepsilon + \frac{1}{2} (C : \varepsilon) : \varepsilon$$

where  $V_U$  is the volume per formula unit of perfect  $\text{CeO}_2$  and  $C$  is the elastic stiffness tensor for the perfect lattice. Taking the derivative of Equation 4 with respect to  $\varepsilon$  yields:

$$\frac{d\Delta E_{total}}{d\varepsilon} = \frac{d\Delta E_{short}}{d\varepsilon} + \frac{d\Delta E_{long}}{d\varepsilon} = 0$$

$$\frac{d\Delta E_{total}}{d\varepsilon} = 0 = \frac{\delta}{V_U} G + C : \varepsilon$$

$$\frac{d\Delta E_{short}}{d\varepsilon} = \frac{d}{d\varepsilon} \left( \frac{\delta}{V_U} G : \varepsilon \right) = \frac{\delta}{V_U} G$$

$$\frac{d\Delta E_{long}}{d\varepsilon} = \frac{1}{2} \frac{d}{d\varepsilon} \{ (C : \varepsilon) : \varepsilon \} = \frac{1}{2} \left\{ \frac{d(C : \varepsilon)}{d\varepsilon} \right\} : \varepsilon + \frac{1}{2} (C : \varepsilon) : \frac{d\varepsilon}{d\varepsilon}$$

$$\frac{d\Delta E_{long}}{d\varepsilon} = \frac{1}{2} \left\{ C : \frac{d\varepsilon}{d\varepsilon} \right\} : \varepsilon + \frac{1}{2} (C : \varepsilon) : \frac{d\varepsilon}{d\varepsilon} = \frac{1}{2} (C : \varepsilon) + \frac{1}{2} (C : \varepsilon) = C : \varepsilon$$

$$\frac{d\Delta E_{total}}{d\varepsilon} = \frac{\delta}{V_U} G + C:\varepsilon = 0$$

$$\varepsilon = \frac{-\delta (C^{-1}G)}{V_U}$$

## Section S2. PDOS Calculations for Stoichiometric and Non-stoichiometric Ceria

Partial density of states (PDOS) were calculated for Ce and O atoms in perfect CeO<sub>2</sub> lattice and shown in Figure S1. Figure S2-S4 show the Ce-5*d* and 4*f* orbitals in vacancy containing lattice for two different scenarios. Analysis of PDOS for Ce-5*d* and 4*f* orbitals before and after the formation of oxygen vacancy has shown the charge localization in 4*f* orbital after  $V_{\ddot{O}}$  formation. Electron localization in Ce-4*f* orbital observed in Figure S3 is consistent with previous computational studies.

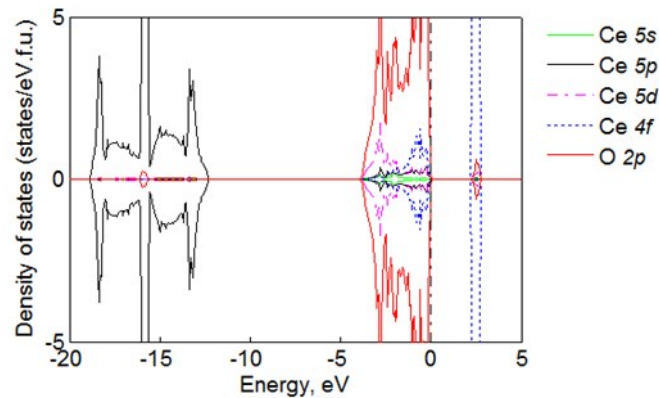

Figure S1. Partial density of states plot for Ce-5s, 5p, 5d, 4f and O-2p orbitals in pure CeO<sub>2</sub>

Supplementary Materials

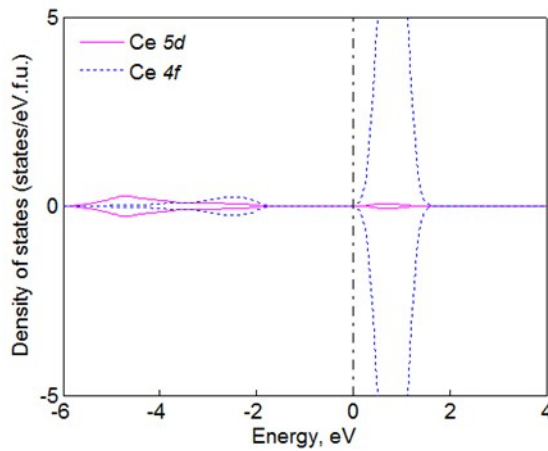

Figure S2. PDOS for  $\text{Ce}^{4+}$ -5d and  $\text{Ce}^{4+}$ -4f orbital for  $\text{Ce}^{4+}$  adjacent to  $V_o^{\bullet\bullet}$ , after  $V_o^{\bullet\bullet}$  formation in asymmetric case. Orbitals show same shape as  $\text{Ce}^{4+}$  in perfect  $\text{CeO}_2$ .

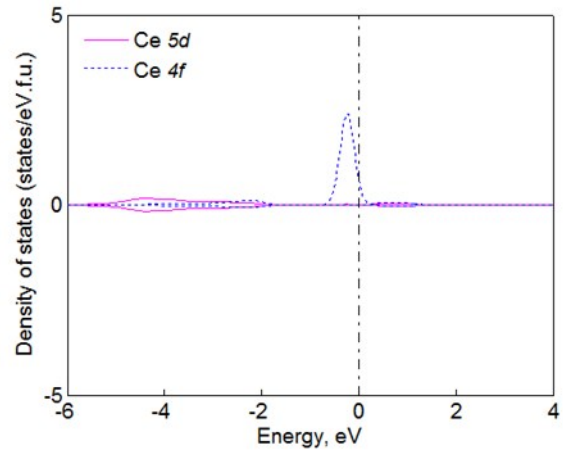

Figure S3. PDOS for  $\text{Ce}^{3+}$ -5d and  $\text{Ce}^{3+}$ -4f orbital for  $\text{Ce}^{3+}$  adjacent to  $V_o^{\bullet\bullet}$ , after  $V_o^{\bullet\bullet}$  formation in asymmetric case. Figure shows localization of excess electron in 4f orbital.

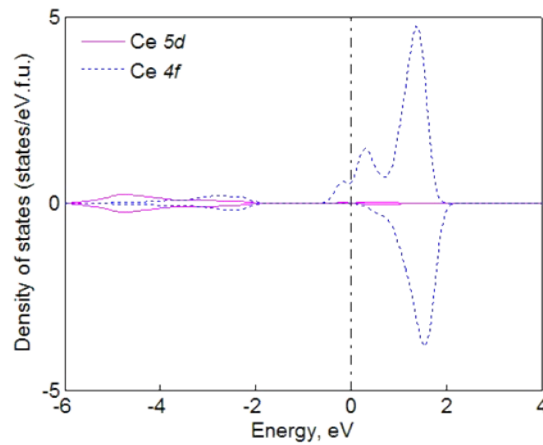

Figure S4. PDOS for  $\text{Ce}^{3.5+}$ -5d and  $\text{Ce}^{3.5+}$ -4f orbital for  $\text{Ce}^{3.5+}$  adjacent to  $V_o^{\bullet\bullet}$ , after  $V_o^{\bullet\bullet}$  formation in symmetric case. Figure shows localization of excess electron in 4f orbital. This scenario is computational artifact as the structure was energetically unfavorable.

**Section S3. Elastic Dipole Moment Calculation**

Dipole moment  $\vec{p} = \sum_i q_i d_i$

$q_i$  = charge on the  $i^{\text{th}}$  particle

$d_i$  = displacement of the  $i^{\text{th}}$  particle

If we assume mean charge as 3.5+ then charge on  $\text{Ce}^{3+}$  is  $0.5 e$  and the charge on  $\text{Ce}^{4+}$  is  $-0.5 e$ .

Therefore, displacement of Ce atoms from oxygen vacancy center:

| vectors | x-comp  | y-comp  | z-comp  | d      |
|---------|---------|---------|---------|--------|
| Ce4+    | 1.4846  | -1.4846 | -1.4658 | 2.5606 |
| Ce4+    | -1.4846 | 1.4846  | -1.4658 | 2.5606 |
| Ce3+    | -1.4488 | -1.4488 | 1.4665  | 2.5196 |
| Ce3+    | 1.4488  | 1.4488  | 1.4665  | 2.5196 |

| Vector sums |        |        |         |
|-------------|--------|--------|---------|
| Ce4+        | 0.0000 | 0.0000 | -2.9316 |
| Ce3+        | 0.0000 | 0.0000 | 2.9331  |

| Resultant | $q_i * d_i$ |         |               |
|-----------|-------------|---------|---------------|
| 0.0000    | 0.0000      | 2.9323  | $e\text{\AA}$ |
|           | $\vec{p}$   | 14.0847 | D             |

1 D (Debye) =  $0.20819434 e\text{\AA}$  [<https://en.wikipedia.org/wiki/Debye>]
